# Supplementary material
Source: PubMed Central journal article supplement (PMC6976783)
Supplement: BPH-177-145-s001.pdf [file BPH-177-145-s001.pdf]

1 **Supporting Information**

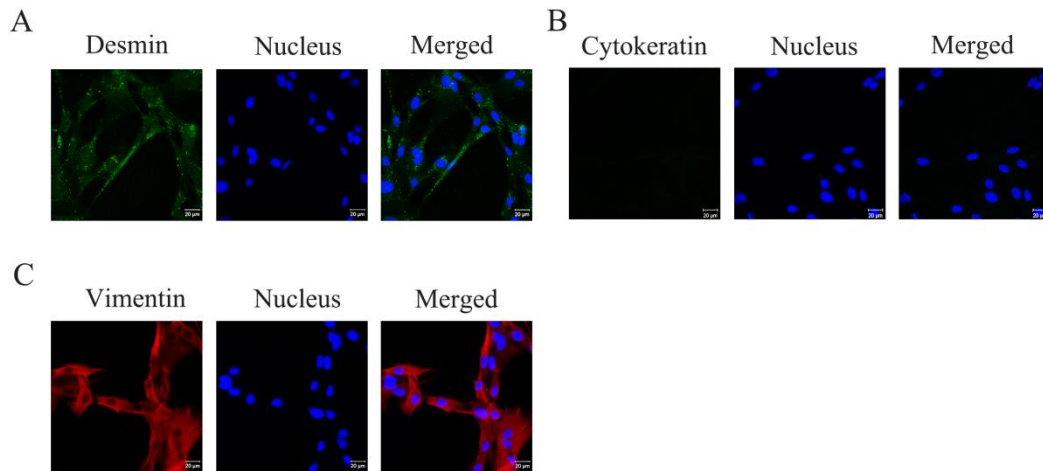

2 **Fig. S1. Immunofluorescence identification of primary GMCs.** Antibodies of  
 3 Desmin (A) and Vimentin (C), markers of glomerular mesangial cells, as well as  
 4 Cytokeratin (B), a marker of epithelial cells were used for the immunofluorescence  
 5 assays.

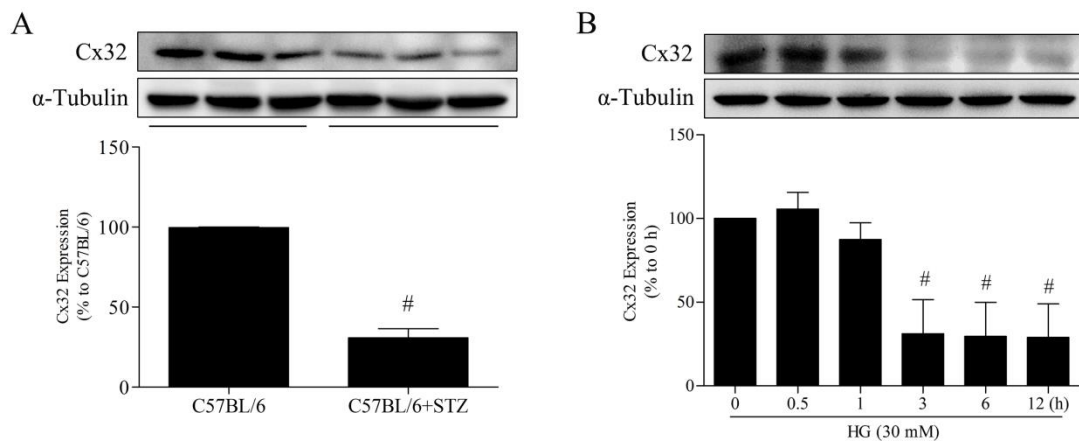

6 **Fig. S2. The expression of Cx32 is downregulated in the kidney of diabetic mice**  
 7 **and HG-induced GMCs.** The expression of Cx32 was detected using western  
 8 blotting analysis. (A) Cx32 expression in the kidney of STZ-induced diabetic mice. <sup>#</sup>*P*  
 9 < 0.01 vs. C57BL/6, n = 5. (B) Cx32 expression in HG-induced GMCs. <sup>#</sup>*P* < 0.05 vs.  
 10 0 h, n = 5. The data are presented as the means ± SD.

11  
 12  
 13  
 14

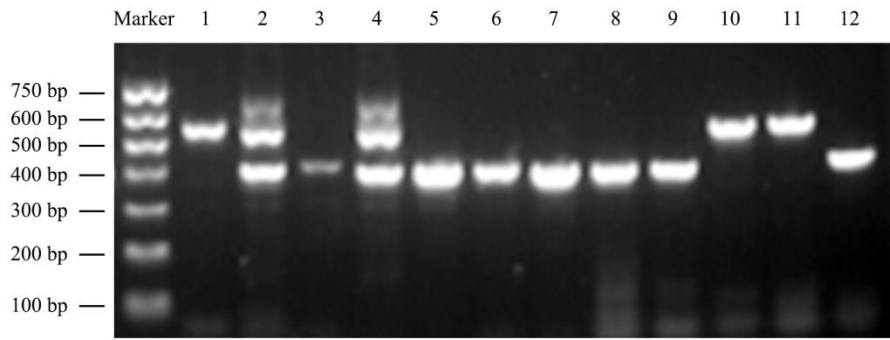

15 **Fig. S3. Genotyping is performed by PCR analysis of DNA from mice tail-tips.**  
 16 Primers used for detection of the Cx32 WT alleles generate a PCR product of 550  
 17 base pairs. Primers used for detection of the Cx32 KO alleles generate a PCR product  
 18 of 414 base pairs.  
 19

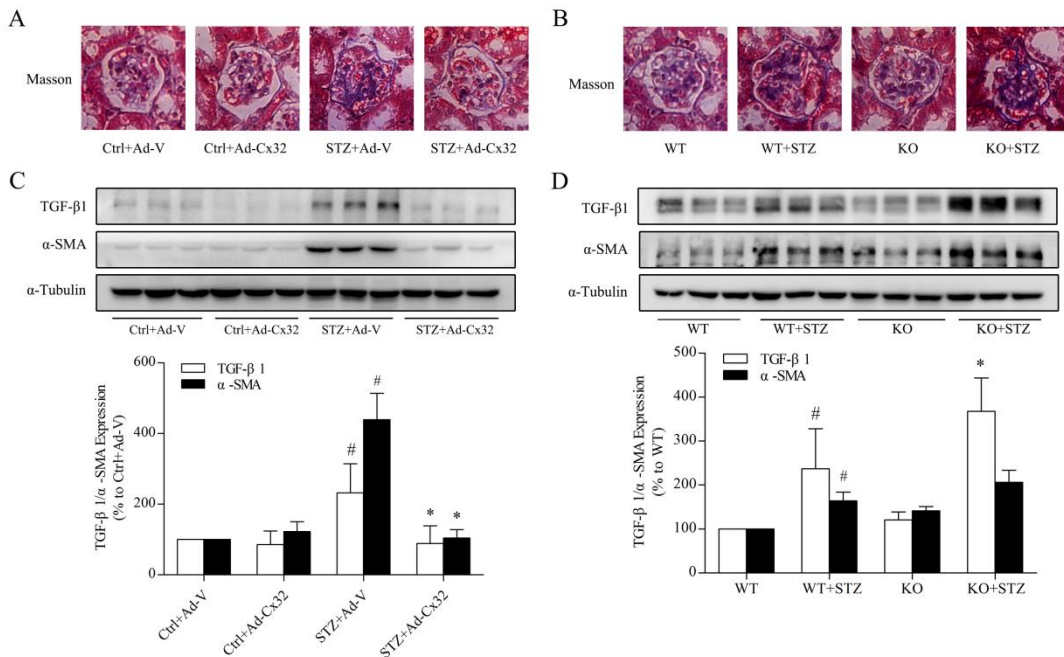

20 **Fig. S4. The effects of Cx32 on renal fibrosis in STZ-induced diabetic mice.** (A  
 21 and B) Glomerular histopathology in the kidney of diabetic mice was analyzed by  
 22 masson staining (400 × magnification), blue indicates collagen fibers. (C)  
 23 Overexpression of Cx32 reduced the expressions of TGF-β1 and α-SMA in the kidney  
 24 of STZ-induced diabetic mice as shown by western blotting. <sup>#</sup>*P* < 0.05 vs. Ctrl + Ad-V;  
 25 <sup>\*</sup>*P* < 0.05 vs. STZ + Ad-V, n = 5. (D) Cx32 deficiency promoted the expressions of

- 26 TGF- $\beta$ 1 and  $\alpha$ -SMA in the kidney of STZ-induced diabetic mice. <sup>#</sup> $P < 0.05$  vs. WT;
- 27 <sup>\*</sup> $P < 0.05$  vs. WT + STZ, n = 5. The data are presented as the means  $\pm$ SD.
